# Supplementary material
Source: PubMed Central journal article supplement (PMC5458788)
Supplement: kfx053_Supp.pdf [file kfx053_Supp.pdf]

## Supplementary Data

Organophosphate Diazinon Altered Quorum Sensing, Cell Motility, Stress Response, and Carbohydrate Metabolism of Gut Microbiome

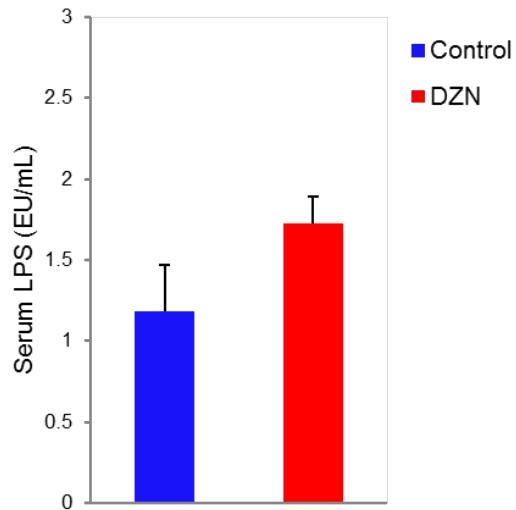

**Figure S1.** Diazinon (DZN) exposure increased the serum LPS level in exposed mice ( $p < 0.05$ ). Serum LPS levels were measured using the LAL Assay kit from LONZA according to the manufacturer's instructions.

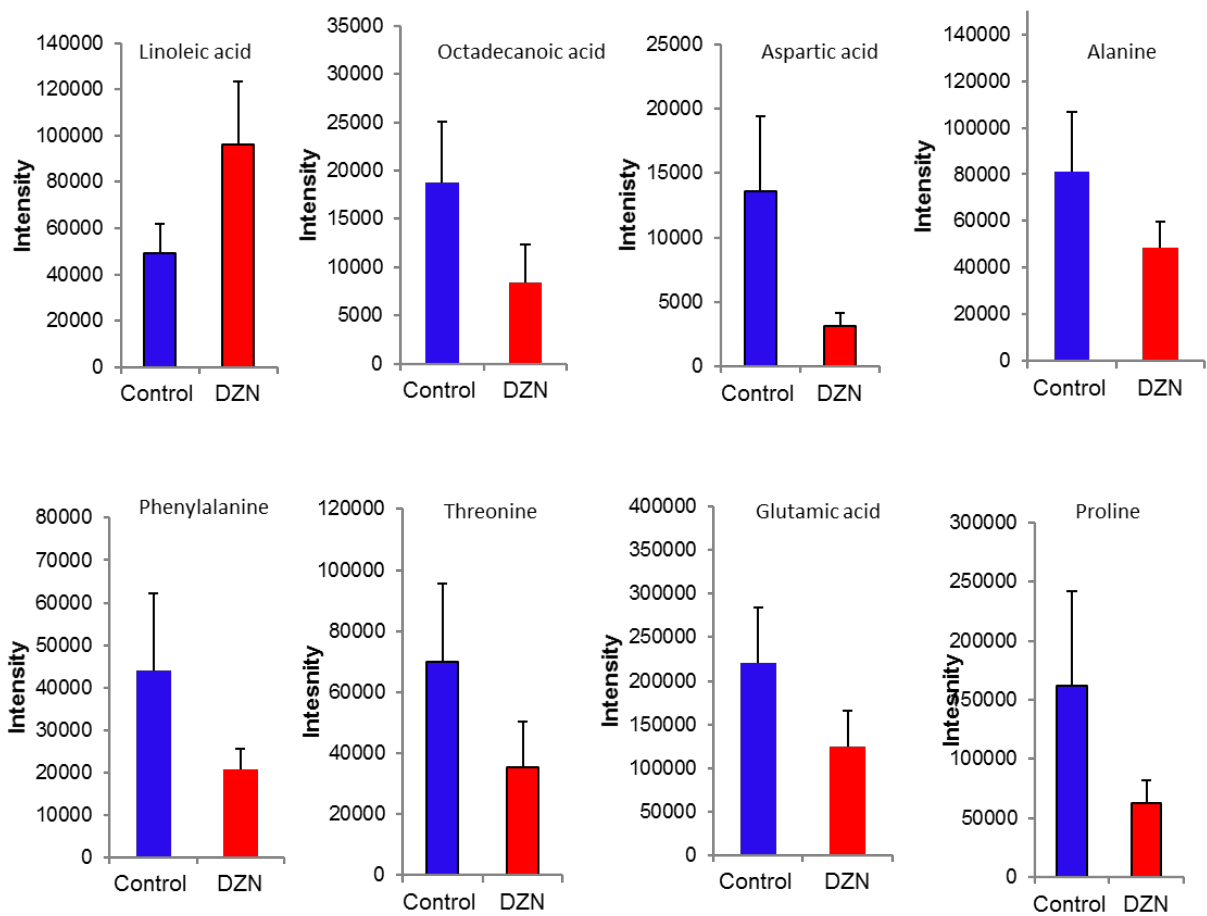

**Figure S2.** Diazinon (DZN) exposure perturbed the homeostasis of fatty acids and amino acids in fecal samples of exposed mice ( $p < 0.05$ ). Metabolites were measured using gas chromatography-mass spectrometry.
